# Supplementary material
Source: PubMed Central journal article supplement (PMC11640585)
Supplement: boe-15-12-6834-s001.pdf [file boe-15-12-6834-s001.pdf]

## **Diffractive hyperchromatic objective for chromatic confocal microscopy: supplement**

**JIABIN CHEN,<sup>†</sup> SHAOBAI LI,<sup>†</sup> WENJUN KANG,<sup>†</sup>  SHUYUAN GUAN, ZHIHAN HONG, AND RONGGUANG LIANG\* **

*Wyant College of Optical Sciences, The University of Arizona, Tucson, Arizona 85721, USA*

*<sup>†</sup>These authors contributed equally to this work.*

*\*[rliang@optics.arizona.edu](mailto:rliang@optics.arizona.edu)*

---

This supplement published with Optica Publishing Group on 14 November 2024 by The Authors under the terms of the [Creative Commons Attribution 4.0 License](https://creativecommons.org/licenses/by/4.0/) in the format provided by the authors and unedited. Further distribution of this work must maintain attribution to the author(s) and the published article's title, journal citation, and DOI.

Supplement DOI: <https://doi.org/10.6084/m9.figshare.27613554>

Parent Article DOI: <https://doi.org/10.1364/BOE.543322>

# Diffraction hyperchromatic objective for chromatic confocal microscopy

Jiabin Chen<sup>†</sup>, Shaobai Li<sup>†</sup>, Wenjun Kang<sup>†</sup>, Shuyuan Guan, Zhihan Hong, Rongguang Liang<sup>\*</sup>

Wyant College of Optical Sciences, The University of Arizona, Tucson, Arizona 85721, USA

<sup>†</sup>These authors contributed equally to this work.

<sup>\*</sup>rliang@optics.arizona.edu

## S1 Zemax Simulation Result

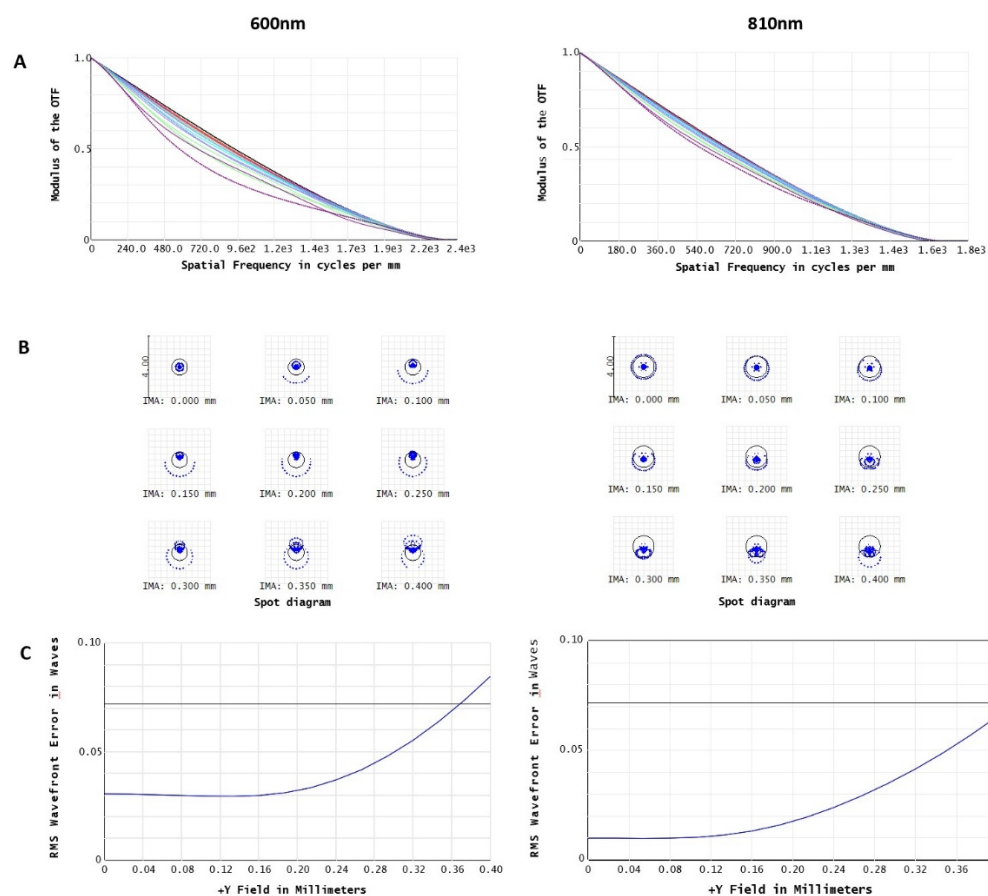

Figure S1. Performance of the designed objective lens at 600 and 800nm. (A) MTF. (B) Spot diagram. (C) RMS wavefront error.
